# Supplementary material for: Deficit Accumulation Index and Biological Markers of Aging in Survivors of Childhood Cancer
Source: PubMed Central journal article supplement (PMC10660189; doi:10.1001/jamanetworkopen.2023.44015), 2023-11-20
Supplement: jamanetwopen-e2344015-s001.pdf [file jamanetwopen-e2344015-s001.pdf]

## Supplemental Online Content

Williams AM, Mandelblatt J, Wang M, et al. Deficit accumulation index and biological markers of aging in survivors of childhood cancer. *JAMA Netw Open*. 2023;6(11):e2344015.  
doi:10.1001/jamanetworkopen.2023.44015

**eFigure.** Participant Flow Chart

**eTable 1.** St. Jude Lifetime Cohort Aging-Related Deficits Accumulation Index

**eTable 2.** Characteristics of Those With and Without Complete Data

**eTable 3.** Specific Results From Linear Regression Models Examining the Associations of mean LTL and EAA Among Survivors of Childhood Cancer

**eTable 4.** Distribution of DAI Groups by Age Categories

This supplemental material has been provided by the authors to give readers additional information about their work.

eFigure: Participant Flow Chart

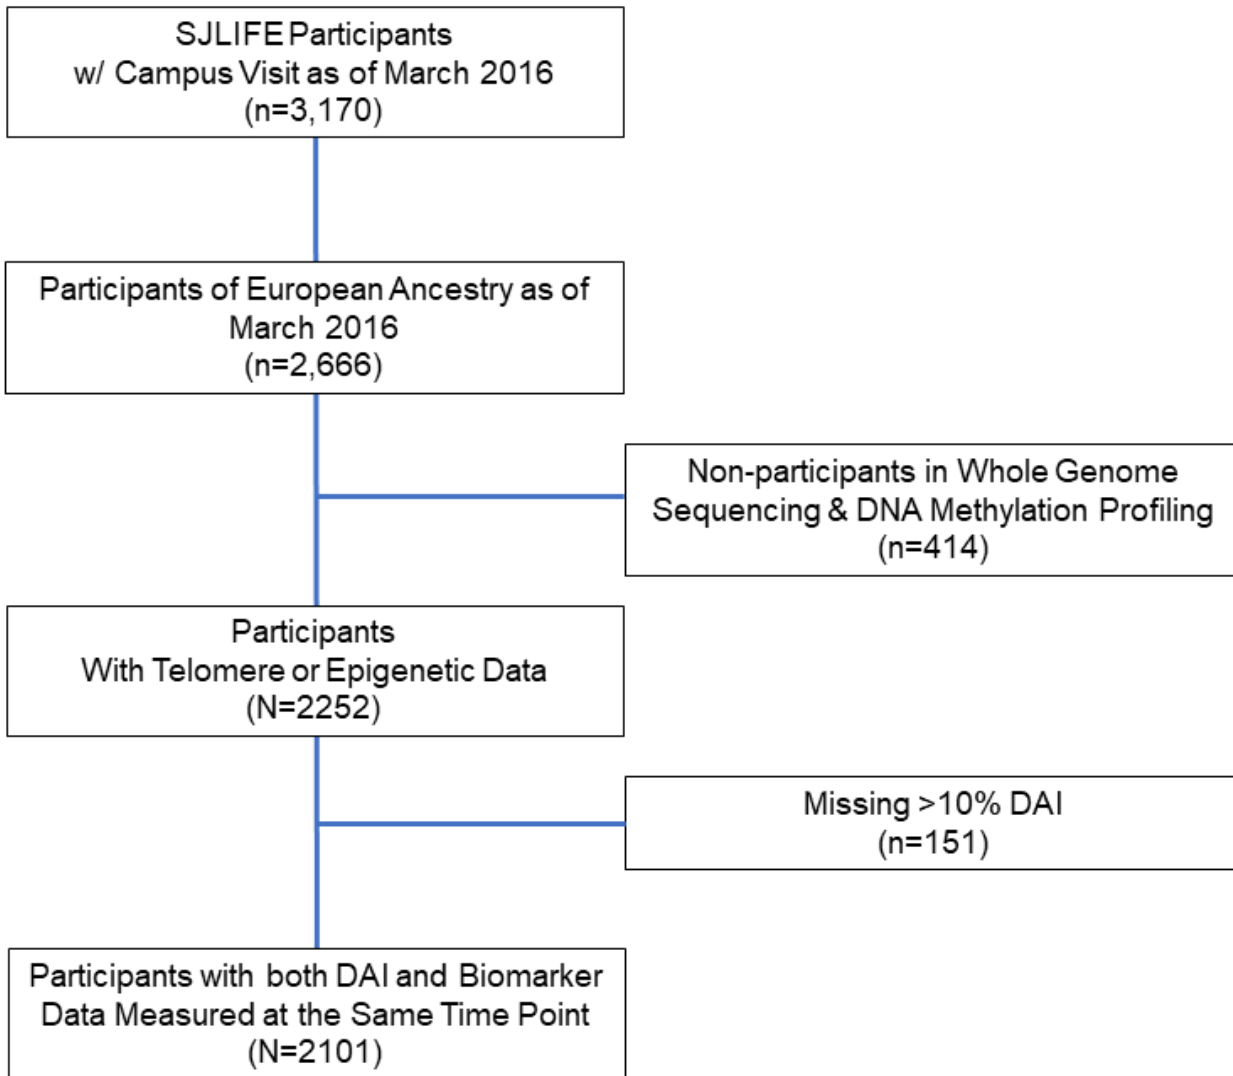

eTable 1: St. Jude Lifetime Cohort Aging-Related Deficits Accumulation Index

| DAI Construct                               | SJLIFE ITEM                                                                                                                                                                                                                | Value/Criteria                                   | DAI Item Weight |
|---------------------------------------------|----------------------------------------------------------------------------------------------------------------------------------------------------------------------------------------------------------------------------|--------------------------------------------------|-----------------|
| 1. Can take bath/shower                     | Does your health now limit you in Bathing or dressing yourself? If so, how much?                                                                                                                                           | Yes limited a lot                                | 1               |
|                                             |                                                                                                                                                                                                                            | Yes, limited a little                            | 0.5             |
|                                             |                                                                                                                                                                                                                            | No Not limited at all                            | 0               |
|                                             |                                                                                                                                                                                                                            | Missing                                          | -               |
| 2. Can walk                                 | Does your health now limit you in Walking 100 yards? If so, how much?                                                                                                                                                      | Yes limited a lot                                | 1               |
|                                             |                                                                                                                                                                                                                            | Yes, limited a little                            | 0.5             |
|                                             |                                                                                                                                                                                                                            | No Not limited at all                            | 0               |
|                                             |                                                                                                                                                                                                                            | Missing                                          | -               |
| 3. Health limited moderate activities       | Does your health now limit you in Moderate activities? If so, how much?                                                                                                                                                    | Yes limited a lot                                | 1               |
|                                             |                                                                                                                                                                                                                            | Yes, limited a little                            | 0.5             |
|                                             |                                                                                                                                                                                                                            | No Not limited at all                            | 0               |
|                                             |                                                                                                                                                                                                                            | Missing                                          | -               |
| 4. Can eat and dress                        | Because of any impairment of health problems, do you need the help of other persons with personal care needs, such as eating, bathing dressing or getting around your home?                                                | Yes                                              | 1               |
|                                             |                                                                                                                                                                                                                            | No                                               | 0               |
|                                             |                                                                                                                                                                                                                            | Missing                                          | -               |
| 5. Take care of one's self                  | Because of any impairment or health problems do you need the help of other persons in handling routine needs, such as everyday household chores, doing necessary business, shopping, or getting around for other purposes? | Yes                                              | 1               |
|                                             |                                                                                                                                                                                                                            | No                                               | 0               |
|                                             |                                                                                                                                                                                                                            | Missing                                          | -               |
| 6. Trouble getting to bathroom on time      | Have you ever been told by a doctor or other health care professional that you have or have had urinary incontinence?                                                                                                      | Yes, and the condition is still present          | 1               |
|                                             |                                                                                                                                                                                                                            | No or Yes but the condition is no longer present | 0               |
|                                             |                                                                                                                                                                                                                            | Missing                                          | -               |
| 7. Health limited climbing stairs           | Does your health now limit you in climbing several flights of stairs? If so, how much?                                                                                                                                     | Yes limited a lot                                | 1               |
|                                             |                                                                                                                                                                                                                            | Yes, limited a little                            | 0.5             |
|                                             |                                                                                                                                                                                                                            | No Not limited at all                            | 0               |
|                                             |                                                                                                                                                                                                                            | Missing                                          | -               |
| 8. Can go shopping for groceries or clothes | Does your health now limit you in lifting or carrying groceries? If so, how much?                                                                                                                                          | Yes limited a lot                                | 1               |
|                                             |                                                                                                                                                                                                                            | Yes, limited a little                            | 0.5             |
|                                             |                                                                                                                                                                                                                            | No Not limited at all                            | 0               |
|                                             |                                                                                                                                                                                                                            | Missing                                          | -               |
| 9. Can do your housework                    | During the past 4 weeks, how much did pain interfere with your normal work,                                                                                                                                                | Extremely                                        | 1               |
|                                             |                                                                                                                                                                                                                            | Quite a bit                                      | 0.75            |

| DAI Construct                                                      | SJLIFE ITEM                                                                                                                                                                                                                                               | Value/Criteria       | DAI Item Weight |
|--------------------------------------------------------------------|-----------------------------------------------------------------------------------------------------------------------------------------------------------------------------------------------------------------------------------------------------------|----------------------|-----------------|
|                                                                    | including both work outside the home and housework?                                                                                                                                                                                                       | Moderately           | 0.5             |
|                                                                    |                                                                                                                                                                                                                                                           | A little bit         | 0.25            |
|                                                                    |                                                                                                                                                                                                                                                           | Not at all           | 0               |
|                                                                    |                                                                                                                                                                                                                                                           | Missing              | -               |
| 10. Pain                                                           | How much bodily pain have you had during the past 4 weeks?                                                                                                                                                                                                | Very Severe          | 1               |
|                                                                    |                                                                                                                                                                                                                                                           | Severe               | 0.8             |
|                                                                    |                                                                                                                                                                                                                                                           | Moderate             | 0.6             |
|                                                                    |                                                                                                                                                                                                                                                           | Mild                 | 0.4             |
|                                                                    |                                                                                                                                                                                                                                                           | Very Mild            | 0.2             |
|                                                                    |                                                                                                                                                                                                                                                           | None                 | 0               |
|                                                                    |                                                                                                                                                                                                                                                           | Missing              | -               |
| 11. General Health                                                 | In general, how would you say your health is?                                                                                                                                                                                                             | Poor                 | 1               |
|                                                                    |                                                                                                                                                                                                                                                           | Fair                 | 0.75            |
|                                                                    |                                                                                                                                                                                                                                                           | Good                 | 0.5             |
|                                                                    |                                                                                                                                                                                                                                                           | Very Good            | 0.25            |
|                                                                    |                                                                                                                                                                                                                                                           | Excellent            | 0               |
|                                                                    |                                                                                                                                                                                                                                                           | Missing              | -               |
| 12. Physical health limited work or activities                     | During the past 4 weeks, how much of the time have you had any of the following problems with your work or other regular daily activities as a result of your physical health? A: Cut down on the amount of time you spent on work or other activities    | All of the time      | 1               |
|                                                                    |                                                                                                                                                                                                                                                           | Most of the time     | 0.75            |
|                                                                    |                                                                                                                                                                                                                                                           | Some of the time     | 0.5             |
|                                                                    |                                                                                                                                                                                                                                                           | A little of the time | 0.25            |
|                                                                    |                                                                                                                                                                                                                                                           | None of the time     | 0               |
|                                                                    |                                                                                                                                                                                                                                                           | Missing              | -               |
| 13. Emotional problems limited work or activities                  | During the past 4 weeks, how much of the time have you had any of the following problems with your work or other regular daily activities as a result of any emotional problems? A: Cut down on the amount of time you spent on work or other activities. | All of the time      | 1               |
|                                                                    |                                                                                                                                                                                                                                                           | Most of the time     | 0.75            |
|                                                                    |                                                                                                                                                                                                                                                           | Some of the time     | 0.5             |
|                                                                    |                                                                                                                                                                                                                                                           | A little of the time | 0.25            |
|                                                                    |                                                                                                                                                                                                                                                           | None of the time     | 0               |
|                                                                    |                                                                                                                                                                                                                                                           | Missing              | -               |
| 14. Physical or emotional health interfered with social activities | During the past 4 weeks, to what extent has your physical health or emotional problems interfered with your normal social activities with family, friends, neighbors, or groups?                                                                          | Extremely            | 1               |
|                                                                    |                                                                                                                                                                                                                                                           | Quite a bit          | 0.75            |
|                                                                    |                                                                                                                                                                                                                                                           | Moderately           | 0.5             |
|                                                                    |                                                                                                                                                                                                                                                           | Slightly             | 0.25            |
|                                                                    |                                                                                                                                                                                                                                                           | Not at all           | 0               |
|                                                                    |                                                                                                                                                                                                                                                           | Missing              | -               |
|                                                                    | During the past 4 weeks, how much of the time have you had any of the                                                                                                                                                                                     | All of the time      | 1               |
|                                                                    |                                                                                                                                                                                                                                                           | Most of the time     | 0.75            |

| DAI Construct                                         | SJLIFE ITEM                                                                                                                                                                                                                                            | Value/Criteria             | DAI Item Weight |
|-------------------------------------------------------|--------------------------------------------------------------------------------------------------------------------------------------------------------------------------------------------------------------------------------------------------------|----------------------------|-----------------|
| 15. Physical health resulted in accomplishing less    | following problems with your work or other regular daily activities as a result of your physical health? B: Accomplished less than you would like                                                                                                      | Some of the time           | 0.5             |
|                                                       |                                                                                                                                                                                                                                                        | A little of the time       | 0.25            |
|                                                       |                                                                                                                                                                                                                                                        | None of the time           | 0               |
|                                                       |                                                                                                                                                                                                                                                        | Missing                    | -               |
| 16. Emotional problems resulted in accomplishing less | During the past 4 weeks, how much of the time have you had any of the following problems with your work or other regular daily activities as a result of any emotional problems? B: Accomplished less than you would like.                             | All of the time            | 1               |
|                                                       |                                                                                                                                                                                                                                                        | Most of the time           | 0.75            |
|                                                       |                                                                                                                                                                                                                                                        | Some of the time           | 0.5             |
|                                                       |                                                                                                                                                                                                                                                        | A little of the time       | 0.25            |
|                                                       |                                                                                                                                                                                                                                                        | None of the time           | 0               |
| 17. Had a lot of energy                               | How much of the time during the past four weeks did you have a lot of energy?                                                                                                                                                                          | Missing                    | -               |
|                                                       |                                                                                                                                                                                                                                                        | All of the time            | 0               |
|                                                       |                                                                                                                                                                                                                                                        | Most of the time           | 0.25            |
|                                                       |                                                                                                                                                                                                                                                        | Some of the time           | 0.5             |
|                                                       |                                                                                                                                                                                                                                                        | A little of the time       | 0.75            |
|                                                       |                                                                                                                                                                                                                                                        | None of the time           | 1               |
| 18. Felt downhearted or blue                          | How much of the time during the past four weeks have you felt downhearted and depressed?                                                                                                                                                               | Missing                    | -               |
|                                                       |                                                                                                                                                                                                                                                        | All of the time            | 1               |
|                                                       |                                                                                                                                                                                                                                                        | Most of the time           | 0.75            |
|                                                       |                                                                                                                                                                                                                                                        | Some of the time           | 0.5             |
|                                                       |                                                                                                                                                                                                                                                        | A little of the time       | 0.25            |
| 19. Felt calm or peaceful                             | How much of the time during the past four weeks have you felt calm and peaceful?                                                                                                                                                                       | Missing                    | -               |
|                                                       |                                                                                                                                                                                                                                                        | All of the time            | 0               |
|                                                       |                                                                                                                                                                                                                                                        | Most of the time           | 0.25            |
|                                                       |                                                                                                                                                                                                                                                        | Some of the time           | 0.5             |
|                                                       |                                                                                                                                                                                                                                                        | A little of the time       | 0.75            |
| 20. Heart Disease Comorbidity:                        | Clinically Assessed and CTCAE Graded Cardiovascular Conditions<br><ul style="list-style-type: none"> <li>- Atrioventricular Heart Block</li> <li>- Conduction Abnormalities</li> <li>- Prolonged QT Interval</li> <li>- Cardiac Dysrhythmia</li> </ul> | ≥ 1 Grade 3 or 4 Condition | 1               |

| DAI Construct                                               | SJLIFE ITEM                                                                                                                                                                                                                                                                                                                                                                                                                                                                                                                                 | Value/Criteria                                                                                                                             | DAI Item Weight                       |
|-------------------------------------------------------------|---------------------------------------------------------------------------------------------------------------------------------------------------------------------------------------------------------------------------------------------------------------------------------------------------------------------------------------------------------------------------------------------------------------------------------------------------------------------------------------------------------------------------------------------|--------------------------------------------------------------------------------------------------------------------------------------------|---------------------------------------|
|                                                             | <ul style="list-style-type: none"> <li>- Sinus Bradycardia</li> <li>- Sinus Tachycardia</li> <li>- Cardiomyopathy</li> <li>- Right Ventricular Systolic Dysfunction</li> <li>- Cor Pulmonale</li> <li>- Pulmonary Hypertension</li> <li>- Heart Valve Disorder</li> <li>- Pericarditis</li> <li>- Aortic Root Aneurysm</li> <li>- Atrial Myxoma</li> <li>- Thrombus</li> <li>- Vascular Disease</li> <li>- Hypertriglyceridemia</li> <li>- Hypercholesterolemia</li> <li>- Myocardial Infarction</li> <li>- Raynaud's Phenomenon</li> </ul> | <p>≥ 1 Grade 2 Condition (but no grade 3 or 4)</p> <p>None or Only Grade 1 Conditions</p> <p>Missing</p>                                   | <p>0.5</p> <p>0</p> <p>-</p>          |
| 21. Diabetes Comorbidity                                    | Clinically Assessed and CTCAE Graded Abnormal Glucose Metabolism                                                                                                                                                                                                                                                                                                                                                                                                                                                                            | <p>≥ 1 Grade 3 or 4 Condition</p> <p>≥ 1 Grade 2 Condition (but no grade 3 or 4)</p> <p>None or Only Grade 1 Conditions</p> <p>Missing</p> | <p>1</p> <p>0.5</p> <p>0</p> <p>-</p> |
| 22. Respiratory Comorbidity:                                | <p>Clinically Assessed and CTCAE Graded Respiratory Conditions</p> <ul style="list-style-type: none"> <li>- Asthma</li> <li>- Chronic Obstructive Pulmonary Disease</li> <li>- Obstructive, Restrictive, Diffusion Deficits</li> <li>- Pleural Space Disorders</li> <li>- Pulmonary Embolism</li> <li>- Obstructive Sleep Apnea</li> </ul>                                                                                                                                                                                                  | <p>≥ 1 Grade 3 or 4 Condition</p> <p>≥ 1 Grade 2 Condition (but no grade 3 or 4)</p> <p>None or Only Grade 1 Conditions</p> <p>Missing</p> | <p>1</p> <p>0.5</p> <p>0</p> <p>-</p> |
| 23. Chronic Liver, Kidney, or Gastrointestinal Comorbidity: | <p>Clinically Assessed and CTCAE Graded Gastrointestinal/Renal Conditions</p> <ul style="list-style-type: none"> <li>- Constipation</li> <li>- Cholecystitis</li> <li>- Chronic Kidney Disease</li> <li>- Chronic Hematuria</li> <li>- Dysphagia</li> </ul>                                                                                                                                                                                                                                                                                 | <p>≥ 1 Grade 3 or 4 Condition</p>                                                                                                          | <p>1</p>                              |

| DAI Construct                                             | SJLIFE ITEM                                                                                                                                                                                                                                                                                                                                                                                                                                                                                                                                                                                                   | Value/Criteria                              | DAI Item Weight |
|-----------------------------------------------------------|---------------------------------------------------------------------------------------------------------------------------------------------------------------------------------------------------------------------------------------------------------------------------------------------------------------------------------------------------------------------------------------------------------------------------------------------------------------------------------------------------------------------------------------------------------------------------------------------------------------|---------------------------------------------|-----------------|
|                                                           | <ul style="list-style-type: none"> <li>- Esophageal Stricture</li> <li>- Esophageal Varices</li> <li>- Esophagitis</li> <li>- Enterocolitis</li> <li>- Fecal Incontinence</li> <li>- Gastritis/Duodenitis</li> <li>- Gastroesophageal Reflux Disease</li> <li>- Hepatopathy</li> <li>- Hepatic Failure</li> <li>- Pancreatitis</li> <li>- Pancreatic Insufficiency</li> <li>- Fibrosis/Cirrhosis</li> <li>- Portal Hypertension</li> <li>- Proctitis</li> <li>- Steatohepatitis</li> <li>- Veno-occlusive Disease of Liver</li> <li>- Urinary Bladder Dysfunction</li> <li>- Urinary Tract Calculi</li> </ul> | ≥ 1 Grade 2 Condition (but no grade 3 or 4) | 0.5             |
|                                                           |                                                                                                                                                                                                                                                                                                                                                                                                                                                                                                                                                                                                               | None or Only Grade 1 Conditions             | 0               |
|                                                           |                                                                                                                                                                                                                                                                                                                                                                                                                                                                                                                                                                                                               | Missing                                     | -               |
| 24. Other Cancer/Leukemia Comorbidity:                    | Secondary and Recurrent Malignancies excluding "Non Melanoma Skin Cancer"                                                                                                                                                                                                                                                                                                                                                                                                                                                                                                                                     | ≥ 1 Grade 3 or 4 Condition                  | 1               |
|                                                           |                                                                                                                                                                                                                                                                                                                                                                                                                                                                                                                                                                                                               | ≥ 1 Grade 2 Condition (but no grade 3 or 4) | 0.5             |
|                                                           |                                                                                                                                                                                                                                                                                                                                                                                                                                                                                                                                                                                                               | None or Only Grade 1 Conditions             | 0               |
|                                                           |                                                                                                                                                                                                                                                                                                                                                                                                                                                                                                                                                                                                               | Missing                                     | -               |
| 25. Glaucoma, Cataracts, or decreased vision Comorbidity: | <p>Have you ever been told by a doctor or other health care professional you have or have had legal blindness, problems with double vision, or other eye problems?</p> <p>Clinically Assessed and CTCAE Graded Ocular Conditions</p> <ul style="list-style-type: none"> <li>- Cataract</li> <li>- Glaucoma</li> </ul>                                                                                                                                                                                                                                                                                         | ≥ 1 Grade 3 or 4 Condition                  | 1               |
|                                                           |                                                                                                                                                                                                                                                                                                                                                                                                                                                                                                                                                                                                               | ≥ 1 Grade 2 Condition (but no grade 3 or 4) | 0.5             |
|                                                           |                                                                                                                                                                                                                                                                                                                                                                                                                                                                                                                                                                                                               | None or Only Grade 1 Conditions             | 0               |
|                                                           |                                                                                                                                                                                                                                                                                                                                                                                                                                                                                                                                                                                                               | Missing                                     | -               |
| 26. Blood Pressure Comorbidity:                           | Clinically Assessed and CTCAE Graded Hypertension                                                                                                                                                                                                                                                                                                                                                                                                                                                                                                                                                             | ≥ 1 Grade 3 or 4 Condition                  | 1               |
|                                                           |                                                                                                                                                                                                                                                                                                                                                                                                                                                                                                                                                                                                               | ≥ 1 Grade 2 Condition (but no grade 3 or 4) | 0.5             |
|                                                           |                                                                                                                                                                                                                                                                                                                                                                                                                                                                                                                                                                                                               | None or Only Grade 1 Conditions             | 0               |

| DAI Construct                            | SJLIFE ITEM                                                                                                                                                                                                  | Value/Criteria                                                                                           | DAI Item Weight |
|------------------------------------------|--------------------------------------------------------------------------------------------------------------------------------------------------------------------------------------------------------------|----------------------------------------------------------------------------------------------------------|-----------------|
|                                          |                                                                                                                                                                                                              | Missing                                                                                                  | -               |
| 27. Cerebrovascular disease              | Clinically Assessed and CTCAE Graded Neurologic Conditions<br>- Cerebrovascular Disease<br>- Intracranial Hemorrhage<br>- Cerebrovascular Accident                                                           | ≥ 1 Grade 3 or 4 Condition                                                                               | 1               |
|                                          |                                                                                                                                                                                                              | ≥ 1 Grade 2 Condition (but no grade 3 or 4)                                                              | 0.5             |
|                                          |                                                                                                                                                                                                              | None or Only Grade 1 Conditions                                                                          | 0               |
|                                          |                                                                                                                                                                                                              | Missing                                                                                                  | -               |
| 28. Osteoporosis Comorbidity             | Clinically Assessed and CTCAE Graded Bone Mineral Density: BMD below expected range for age and sex (adjusted for amputation)                                                                                | ≥ 1 Grade 3 or 4 Condition                                                                               | 1               |
|                                          |                                                                                                                                                                                                              | ≥ 1 Grade 2 Condition (but no grade 3 or 4)                                                              | 0.5             |
|                                          |                                                                                                                                                                                                              | None or Only Grade 1 Conditions                                                                          | 0               |
|                                          |                                                                                                                                                                                                              | Missing                                                                                                  | -               |
| 29. Thyroid Comorbidity                  | Clinically Assessed and CTCAE Graded Endocrine Conditions:<br>- Hypothyroidism<br>- Hyperthyroidism<br>- Thyroid cyst/nodule<br>- Hypoparathyroidism<br>- Hyperparathyroidism                                | ≥ 1 Grade 3 or 4 Condition                                                                               | 1               |
|                                          |                                                                                                                                                                                                              | ≥ 1 Grade 2 Condition (but no grade 3 or 4)                                                              | 0.5             |
|                                          |                                                                                                                                                                                                              | None or Only Grade 1 Conditions                                                                          | 0               |
|                                          |                                                                                                                                                                                                              | Missing                                                                                                  | -               |
| 30. Shingles or other chronic infections | Have you ever had Zoster (shingles)?<br>And do you take chronic medications because of shingles?<br><br>Clinically Assessed and CTCAE Graded<br>- Immunodeficiency<br>- Chronic Hepatitis<br>- HIV Infection | Any grade 3 or higher condition or Any "yes, and the condition is still present" (for questionnaire)     | 1               |
|                                          |                                                                                                                                                                                                              | Any grade 2 or higher condition or Any "yes, and the condition is still present" (for questionnaire)     | 0.5             |
|                                          |                                                                                                                                                                                                              | No grade 2 or higher condition and No or Yes, but the condition is no longer present (for questionnaire) | 0               |
|                                          |                                                                                                                                                                                                              | Missing                                                                                                  | -               |
| 32. Weight/BMI                           | Self-reported current weight and height                                                                                                                                                                      | Obese BMI $\geq 30$                                                                                      | 1               |
|                                          |                                                                                                                                                                                                              | Underweight BMI $< 18.5$                                                                                 | 1               |
|                                          |                                                                                                                                                                                                              | Normal/Overweight BMI $\geq 18.5$ and $< 30$                                                             | 0               |
|                                          |                                                                                                                                                                                                              | Missing                                                                                                  | -               |
| 33. Poly-pharmacy                        | Self-reported medications taken regularly during the last two years                                                                                                                                          | $\geq 5$ Prescription Meds                                                                               | 1               |
|                                          |                                                                                                                                                                                                              | $< 5$ Prescription Meds                                                                                  | 0               |
|                                          |                                                                                                                                                                                                              | Missing                                                                                                  | -               |
| 34. Timed Up and Go                      | Timed Up and Go[1, 2]                                                                                                                                                                                        | $> 6$ seconds                                                                                            | 1               |
|                                          |                                                                                                                                                                                                              | $\leq 6$ seconds                                                                                         | 0               |



| DAI Construct                       | SJLIFE ITEM                                                                                                                                                                  | Value/Criteria                                              | DAI Item Weight |
|-------------------------------------|------------------------------------------------------------------------------------------------------------------------------------------------------------------------------|-------------------------------------------------------------|-----------------|
|                                     |                                                                                                                                                                              | Missing                                                     | -               |
| 35. Depression                      | Brief Symptom Inventory Depression Subscale[3]                                                                                                                               | T-Score <=65                                                | 0               |
|                                     |                                                                                                                                                                              | 65> T-score <=70                                            | 0.5             |
|                                     |                                                                                                                                                                              | T-score >70                                                 | 1               |
|                                     |                                                                                                                                                                              | Missing                                                     | -               |
| 36. Anxiety                         | Brief Symptom Inventory Anxiety Subscale[3]                                                                                                                                  | T-Score <=65                                                | 0               |
|                                     |                                                                                                                                                                              | 65> T-score <=70                                            | 0.5             |
|                                     |                                                                                                                                                                              | T-score >70                                                 | 1               |
|                                     |                                                                                                                                                                              | Missing                                                     | -               |
| 37. Fatigue                         | Vitality subscale of Short-Form Health Survey-36[4]                                                                                                                          | T-Score <10 <sup>th</sup> percentile                        | 1               |
|                                     |                                                                                                                                                                              | T-Score >=10 <sup>th</sup> percentile                       | 0               |
|                                     |                                                                                                                                                                              | Missing                                                     | -               |
| 38. Balance Problems                | Have you ever been told by a doctor or other health care professional you have or have had problems with balance, equilibrium or ability to reach for or manipulate objects? | Any "yes, and the condition is still present"               | 1               |
|                                     |                                                                                                                                                                              | No or Yes, but the condition is no longer present, not sure | 0               |
|                                     |                                                                                                                                                                              | Missing                                                     | -               |
| 39. Hearing Problems                | Have you ever been told by a doctor or other health care professional you have or have had hearing loss requiring hearing aid, deafness, tinnitus ?                          | Any "yes, and the condition is still present"               | 1               |
|                                     |                                                                                                                                                                              | No or Yes, but the condition is no longer present           | 0               |
|                                     |                                                                                                                                                                              | Missing                                                     | -               |
| 40. Smell and taste problems        | Have you ever been told by a doctor or other health care professional you have or have had abnormal sense of taste or loss of taste or smell lasting for 3 months or more?   | Any "yes, and the condition is still present"               | 1               |
|                                     |                                                                                                                                                                              | No or Yes, but the condition is no longer present           | 0               |
|                                     |                                                                                                                                                                              | Missing                                                     | -               |
| 41. Weakness                        | Have you ever been told by a doctor or other health care professional you have or have had weakness or inability to move arms or legs?                                       | Yes and the condition is still present                      | 1               |
|                                     |                                                                                                                                                                              | No or Yes but the condition is longer present               | 0               |
|                                     |                                                                                                                                                                              | Missing                                                     | -               |
| 42. Loss of sense of touch          | Have you ever been told by a doctor or other health care professional you have or have had decreased sense of touch or feeling in hands, fingers, arms or legs               | Yes and the condition is still present                      | 1               |
|                                     |                                                                                                                                                                              | No or Yes but the condition is longer present               | 0               |
|                                     |                                                                                                                                                                              | Missing                                                     | -               |
| 43. Problems chewing and swallowing | Have you ever been told by a doctor or other health care professional you have or have had problems chewing or swallowing solids or liquids?                                 | Yes and the condition is still present                      | 1               |
|                                     |                                                                                                                                                                              | No or Yes but the condition is longer present               | 0               |
|                                     |                                                                                                                                                                              | Missing                                                     | -               |

| <b>DAI Construct</b>  | <b>SJLIFE ITEM</b>                                                                                                                | <b>Value/Criteria</b>                       | <b>DAI Item Weight</b> |
|-----------------------|-----------------------------------------------------------------------------------------------------------------------------------|---------------------------------------------|------------------------|
| 44. Vigorous Activity | Does your health now limit you in vigorous activities, such as running, lifting heavy objects, participating in strenuous sports? | Yes limited a lot                           | 1                      |
|                       |                                                                                                                                   | Yes, limited a little                       | 0.5                    |
|                       |                                                                                                                                   | No Not limited at all                       | 0                      |
|                       |                                                                                                                                   | Missing                                     | -                      |
| 44. Arthritis         | Clinically Assessed and CTCAE graded:<br>-arthritis<br>-arthralgia                                                                | ≥ 1 Grade 3 or 4 Condition                  | 1                      |
|                       |                                                                                                                                   | ≥ 1 Grade 2 Condition (but no grade 3 or 4) | 0.5                    |
|                       |                                                                                                                                   | None or Only Grade 1 Conditions             | 0                      |
|                       |                                                                                                                                   | Missing                                     | -                      |

eTable 2: Characteristics of those with and without complete data.

|                                       | <b>Without Biomarker Data<br/>n=565</b> | <b>With Biomarker Data<br/>n=2101</b> |
|---------------------------------------|-----------------------------------------|---------------------------------------|
| Age at Baseline Evaluation (mean(SD)) | 30.5 (8.0)                              | 32.5 (8.6)                            |
|                                       | <b>N(%)</b>                             | <b>N(%)</b>                           |
| Sex                                   |                                         |                                       |
| Female                                | 264 (46.7)                              | 979 (46.6)                            |
| Male                                  | 301 (53.3)                              | 1122 (53.4)                           |
| Diagnosis                             |                                         |                                       |
| Retinoblastoma                        | 17 (3.0)                                | 53 (2.5)                              |
| Wilms tumor                           | 24 (4.2)                                | 135 (6.4)                             |
| Others                                | 44 (7.8)                                | 114 (5.4)                             |
| Acute lymphoblastic leukemia          | 202 (35.8)                              | 717 (34.1)                            |
| Acute Myeloid Leukemia                | 43 (7.6)                                | 54 (2.6)                              |
| CNS tumor                             | 51 (9.0)                                | 227 (10.8)                            |
| Neuroblastoma                         | 15 (2.7)                                | 105 (5.0)                             |
| Hodgkin lymphoma                      | 64 (11.3)                               | 260 (12.4)                            |
| Non-Hodgkin lymphoma                  | 34 (6.0)                                | 166 (7.9)                             |
| Osteosarcoma                          | 24 (4.2)                                | 72 (3.4)                              |
| Ewing sarcoma                         | 17 (3.0)                                | 75 (3.6)                              |
| Soft tissue sarcoma                   | 30 (5.3)                                | 123 (5.9)                             |
| Cranial Radiation <sup>1</sup>        |                                         |                                       |
| No                                    | 342 (62.2)                              | 1431 (68.8)                           |
| Yes                                   | 208 (37.8)                              | 649 (31.2)                            |
| Chest Radiation <sup>2</sup>          |                                         |                                       |
| No                                    | 391 (71.1)                              | 1611 (77.3)                           |
| Yes                                   | 159 (28.9)                              | 474 (22.7)                            |
| Abdomen/Pelvic radiation <sup>3</sup> |                                         |                                       |
| No                                    | 354 (64.5)                              | 1456 (69.9)                           |
| Yes                                   | 195 (35.5)                              | 628 (30.1)                            |
| Vincristine                           |                                         |                                       |
| No                                    | 187 (33.1)                              | 610 (29.0)                            |
| Yes                                   | 378 (66.9)                              | 1491 (71.0)                           |
| Anthracyclines                        |                                         |                                       |
| No                                    | 203 (35.9)                              | 872 (41.5)                            |
| Yes                                   | 362 (64.1)                              | 1229 (58.5)                           |
| Alkylating Agents                     |                                         |                                       |
| No                                    | 198 (35.0)                              | 861 (41.0)                            |
| Yes                                   | 367 (65.0)                              | 1240 (59.0)                           |
| Platinum Agents                       |                                         |                                       |

|                                       | <b>Without Biomarker Data<br/>n=565</b> | <b>With Biomarker Data<br/>n=2101</b> |
|---------------------------------------|-----------------------------------------|---------------------------------------|
| Age at Baseline Evaluation (mean(SD)) | 30.5 (8.0)                              | 32.5 (8.6)                            |
|                                       | <b>N(%)</b>                             | <b>N(%)</b>                           |
| No                                    | 476 (84.2)                              | 1867 (88.9)                           |
| Yes                                   | 89 (15.8)                               | 234 (11.1)                            |
| Corticosteroids                       |                                         |                                       |
| No                                    | 277 (49.0)                              | 1074 (51.1)                           |
| Yes                                   | 288 (51.0)                              | 1027 (48.9)                           |
| Neurosurgery                          |                                         |                                       |
| No                                    | 512 (90.6)                              | 1853 (88.2)                           |
| Yes                                   | 53 (9.4)                                | 248 (11.8)                            |

eTable 3: Specific results from linear regression models examining the associations of mean LTL and EAA among survivors of childhood cancer.

|                                     | Mean LTL Residual     |                                  |         | Epigenetic Age Acceleration |                                  |                 |
|-------------------------------------|-----------------------|----------------------------------|---------|-----------------------------|----------------------------------|-----------------|
|                                     | Adjusted Mean (95%CI) | Adjusted Mean Difference (95%CI) | p-value | Adjusted Mean (95%CI)       | Adjusted Mean Difference (95%CI) | p-value         |
| <b>Overall</b>                      |                       |                                  |         |                             |                                  |                 |
| Low DAI (<0.2)                      | 0.03(-0.03, 0.09)     | 0.0 (ref.)                       | -       | -0.84(-1.23, -0.45)         | 0.0 (ref.)                       | -               |
| Medium DAI (0.2 to <0.35)           | -0.05(-0.16, 0.06)    | -0.07 (-0.22, 0.07)              | 0.426   | <b>0.93 (0.23, 1.64)</b>    | <b>1.77(0.85, 2.69)</b>          | <b>&lt;.001</b> |
| High DAI (>=0.35)                   | -0.04(-0.18, 0.11)    | -0.06 (-0.25, 0.12)              | 0.679   | <b>2.82 (1.87, 3.78)</b>    | <b>3.66 (2.47, 4.85)</b>         | <b>&lt;.001</b> |
| <b>Overall Model 2<sup>1</sup></b>  |                       |                                  |         |                             |                                  |                 |
| Low DAI (<0.2)                      | 0.019(-0.07, 0.08)    | 0.0 (ref.)                       | -       | 0.07(-0.38, 0.51)           | 0.0 (ref.)                       | -               |
| Medium DAI (0.2 to <0.35)           | -0.051(-0.16, 0.06)   | -0.06(-0.20, 0.08)               | 0.575   | <b>1.27(0.57, 1.96)</b>     | <b>1.20(0.32, 2.09)</b>          | <b>0.005</b>    |
| High DAI (>=0.35)                   | -0.03(-0.18, 0.12)    | -0.04(-0.22, 0.15)               | 0.864   | <b>2.63(1.70, 3.55)</b>     | <b>2.56(1.41, 3.71)</b>          | <b>&lt;.001</b> |
| <b>Acute Lymphoblastic Leukemia</b> |                       |                                  |         |                             |                                  |                 |
| Low DAI (<0.2)                      | -0.06(-0.16, 0.04)    | 0.0 (ref.)                       | -       | -0.77(-1.39, -0.16)         | 0.0 (ref.)                       | -               |
| Medium DAI (0.2 to <0.35)           | -0.08(-0.27, 0.12)    | -0.02(-0.27, 0.23)               | 0.982   | <b>1.50(0.36, 2.63)</b>     | <b>2.27(0.78, 3.76)</b>          | <b>0.001</b>    |
| High DAI (>=0.35)                   | 0.01(-0.28, 0.29)     | 0.06(-0.29, 0.41)                | 0.902   | 1.08(-0.61, 2.77)           | 1.85(-0.22, 3.93)                | 0.088           |
| <b>Hodgkin Lymphoma</b>             |                       |                                  |         |                             |                                  |                 |
| Low DAI (<0.2)                      | -0.09(-0.26, 0.08)    | 0.0 (ref.)                       | -       | 3.80(2.71, 4.87)            | 0.0 (ref.)                       | -               |
| Medium DAI (0.2 to <0.35)           | -0.21(-0.49, 0.07)    | -0.11(-0.50, 0.27)               | 0.741   | 4.17(2.42, 5.92)            | 0.37(-2.02, 2.76)                | 0.922           |
| High DAI (>=0.35)                   | -0.08(-0.37, 0.21)    | 0.01(-0.38, 0.41)                | 0.996   | 6.00(4.16, 7.84)            | 2.20(-0.27, 4.68)                | 0.089           |
| <b>CNS Tumors</b>                   |                       |                                  |         |                             |                                  |                 |
| Low DAI (<0.2)                      | 0.11(-0.10, 0.32)     | 0.0 (ref.)                       | -       | -1.85(-3.08, -0.62)         | 0.0 (ref.)                       | -               |
| Medium DAI (0.2 to <0.35)           | -0.10(-0.41, 0.21)    | -0.21(-0.64, 0.22)               | 0.458   | -2.27(-4.12, -0.42)         | -0.41(-2.96, 2.13)               | 0.916           |
| High DAI (>=0.35)                   | 0.22(-0.24, 0.67)     | 0.11(-0.47, 0.69)                | 0.893   | <b>2.49(-0.29, 5.26)</b>    | <b>4.34(0.82, 7.86)</b>          | <b>0.012</b>    |
| <b>Age &lt;30</b>                   |                       |                                  |         |                             |                                  |                 |
| Low DAI (<0.2)                      | -0.02(-0.11, 0.08)    | 0.0 (ref.)                       | -       | -0.66 (-1.24, -0.08)        | 0.0 (ref.)                       | -               |
| Medium DAI (0.2 to <0.35)           | -0.01(-0.23, 0.20)    | 0.01(-0.27, 0.28)                | 0.999   | <b>1.42(0.12, 2.72)</b>     | <b>2.08(0.45, 3.71)</b>          | <b>0.009</b>    |
| High DAI (>=0.35)                   | -0.26(-0.64, 0.12)    | -0.24(-0.69, 0.21)               | 0.407   | <b>4.28(1.90, 6.67)</b>     | <b>4.94(2.14, 7.75)</b>          | <b>&lt;.001</b> |
| <b>Age 30 to &lt;40</b>             |                       |                                  |         |                             |                                  |                 |
| Low DAI (<0.2)                      | 0.13(0.03, 0.22)      | 0.0 (ref.)                       | -       | -0.49(-1.13, 0.15)          | 0.0 (ref.)                       | -               |
| Medium DAI (0.2 to <0.35)           | -0.09(-0.27, 0.09)    | -0.22(-0.45, 0.01)               | 0.066   | 0.01(-0.23, 0.24)           | -0.12(-0.42, 0.17)               | 0.573           |
| High DAI (>=0.35)                   | 0.76(-0.37, 1.90)     | 1.26(-0.24, 2.75)                | 0.115   | <b>1.75(0.19, 3.31)</b>     | <b>2.24(0.31, 4.17)</b>          | <b>0.019</b>    |
| <b>Age 40+</b>                      |                       |                                  |         |                             |                                  |                 |
| Low DAI (<0.2)                      | -0.07(-0.20, 0.05)    | 0.0 (ref.)                       | -       | -1.63(-2.54, -0.71)         | 0.0 (ref.)                       | -               |
| Medium DAI (0.2 to <0.35)           | -0.04(-0.21, 0.13)    | 0.04(-0.20, 0.28)                | 0.926   | 0.55 (-0.70, 1.77)          | 2.17 (0.43, 3.92)                | 0.011           |
| High DAI (>=0.35)                   | -0.001 (-0.20, 0.19)  | 0.08 (-0.19, 0.34)               | 0.766   | <b>2.78(1.37, 4.19)</b>     | <b>4.41(2.50, 6.31)</b>          | <b>&lt;.001</b> |

Note: All models were adjusted for sex and time since diagnosis. <sup>1</sup> Model 2 is further adjusted for treatment exposures that are associated with either mLTL or EAA.

eTable 4: Distribution of DAI groups by age categories.

|            | <b>Age Group</b> |                     |            |
|------------|------------------|---------------------|------------|
|            | <b>&lt;30</b>    | <b>30 to &lt;40</b> | <b>40+</b> |
| <b>DAI</b> |                  |                     |            |
| Low        | 617 (79.5)       | 553 (69.4)          | 266 (50.4) |
| Medium     | 120 (15.5)       | 158 (19.8)          | 150 (28.4) |
| High       | 39 (5.0)         | 86 (10.8)           | 112 (21.2) |
