# Supplementary material for: Deficit Accumulation Index and Biological Markers of Aging in Survivors of Childhood Cancer
Source: PubMed Central journal article supplement (PMC10660189; doi:10.1001/jamanetworkopen.2023.44015), 2023-11-20
Supplement: jamanetwopen-e2344015-s002.pdf [file jamanetwopen-e2344015-s002.pdf]

## Data Sharing Statement

Williams. Deficit Accumulation Index and Biological Markers of Aging in Survivors of Childhood Cancer. *JAMA Netw Open*. Published November 20, 2023.

doi:10.1001/jamanetworkopen.2023.44015

### Data

**Data available:** Yes

**Data types:** Deidentified participant data, Data dictionary

**How to access data:** The data is accessible through the St. Jude Cloud (<https://stjude.cloud>)

**When available:** With publication

### Supporting Documents

**Document types:** None

### Additional Information

**Who can access the data:** researchers whose proposed use of the data has been approved

**Types of analyses:** For research purposes

**Mechanisms of data availability:** after approval of a proposal by the data access committee and with a signed data access agreement
